# Supplementary material for: Current status and issues regarding genetic medicine after cancer gene panel testing in Japanese patients with metastatic prostate cancer
Source: Mol Clin Oncol. 2025 Oct 9;23(6):108. doi: 10.3892/mco.2025.2903 (PMC12557695; doi:10.3892/mco.2025.2903)
Supplement: Summary of potential actionable gene alterations. [file Supplementary_Data2.xlsx]

## Sheet: Sheet1
Table SII. Summary of potential actionable gene alterations.
Case	F1CDx or F1LCDx	Potential actionable gene alteration
1	F1CDx	APC p.G1412*
2	F1CDx	CCND1 amp	FGF3 amp	FGF4 amp
3	F1CDx	BRCA2 p.A902fs*2	RAD54L R654fs*8	APC p.E1097*
4	F1CDx	RAC1 amp	CDK12 p.K48fs*9	CDK12 p.P631fs*19
5	F1CDx	MDM4 amp	CDK12 p.T82fs*7	CDK12 p.Y913fs*1
6	F1CDx	BRCA1 HD(exon 5-8)
7	F1CDx	MYC amp	XPO1 amp	REL amp	AR amp	PTEN HD
8	F1CDx	ATM p.S83*	RAD54L p.E741K
9	F1CDx	BRAF p.G469A
10	F1CDx	AR amp	EGFR p.V897A	NBN p.S42fs*7
11$	F1CDx	TMB-high (17.7 Muts/Mbp)	MSH2 p.V915fs*1	PBRM1 p.R1027*	APC p.N1984fs*60	RB1 p.R455*
12	F1CDx	ARID1A p.Q1334_R1335insQQ	IRS2 p.A386V
13	F1CDx	POLD1 p.D893G	CD22 p.Q152E	CTNNA1 p.D96Y	PARP3 p.N80del	PTPRO p.G260R
14	F1CDx	CDK12 p.E657fs*96
15	F1CDx	BRCA2 p.I729fs*21	SMAD4 p.R361H	ATM p.K486E	PIK3C2G p.K103E
16	F1CDx	TSC2 p.P878S	FANCG p.A153G	PTEN HD	HGF p.G107R
17	F1CDx	AR p.L702H	STAG p.T695fs*22	ARID1A p.Q449*	FAM123B p.Q271H	APC HD	BRCA2 HD(exon 9-27)	LTK p.G213_A214insGGG
18	F1CDx	FANCC p.Q357*	POLD1 p.R1086W	GATA6 p.E51K	LTK p.G213_A214insGGG
19	F1CDx	MSH3 p.V455G
20	F1LCDx	TP53 p.R273H	DNMT3A p.R635W	DNMT3A c.2598-1G>T	DNMT3A c.2173+1G>A
21	F1LCDx	FGF19 amp	FGF3 amp	FGF4 amp	CCND1 amp	AR amp	MDM4 amp	DNMT3A p.C559fs*91	CDK12 p.C1009fs*48	PIK3C2B amp
22	F1CDx	TP53 p.Y163N	ASXL1 p.G646fs*12	TMPRSS2-ERG fusion
23	F1LCDx	None
24	F1CDx	CTNNB1 p.T41A
25	F1CDx	CCND1 amp	FGF4 amp	FGF3 amp	FGF19 amp	CDK12 p.Q937fs*18
26	F1LCDx	CTNNB1 p.T41I	AR p.L702H	ASXL1 p.S766fs*6	RAD21 p.Q432*	ASXL1 p.V515fs*13	DNMT3A p.S255fs*7
27	F1LCDx	None
28	F1CDx	WHSC1L1 amp	MYC amp	KDM6A p.S637fs*53	RAD21 amp	ATM c.5918+1G>T	ZNF703 amp	LYN amp	WHSC1-FGFR fusion
29	F1CDx	VEGFA amp	CCND3 amp	MYC amp	PIM1 amp	TP53 c.560-1G>T	SETD2 p.S1093N	RB1 p.F684fs*12
30	F1LCDx	SF3B1 p.K700E	TP53 p.Y234C	ASXL1 p.G646fs*12	CDK12 p.Q780*	TET2 p.T229fs*25
31	F1LCDx	MLL2 p.E2705*	TP53 p.H233fs*15	TP53 p.Q331*	ROS1 rearrangement intron 33	MLL2 rearrangement exon 39
32	F1CDx	PTEN p.F215_Q219del	TP53 p.L130R	BRCA2 p.E790fs*20	TMPRSS2-ERG fusion
33	F1LCDx	AR amp	CDK12 p.R322*	CDK12 p.N31fs*24	GATA3 p.L239fs*64
34	F1LCDx	DNMT3A p.R635W	TP53 p.H193R	TP53 p.Y163C
35	F1LCDx	BRAF p.K601E
36	F1LCDx	DNMT3A c.2597+1G>A	RB1 p.V654L	TP53 p.R248Q
37	F1CDx	WHSC1L1 amp	MLL2 p.P674fs*257	RB1 c.2663+1_2663+8delGTAGGAAC	TP53 p.H193R	CREBBP c.4281-1_4291delGGCGTGTGTACA	ZNF703 amp
38	F1LCDx	DNMT3A p.R635W
39	F1CDx	NBN p.K408*	APC p.D1425fs*10	BRCA2 p.M2393fs*19	EMSY p.P347A
40	F1CDx	CCND1 amp	CDK4 amp	ERBB3 amp	CDK12 p.L123fs*4	EPHB4 amp	CDK12 deletion intron2 - exon4
41	F1CDx	AR amp	WHSC1L1 amp	TP53 p.C141fs*29	ZNF703 amp	TMPRSS2-SLC30A4 fusion	PIK3R1 rearrangement intron 7
42	F1CDx	BRCA2 rearrangement exon 20
43	F1CDx	CDK12 p.K199*	CDK12 p.K90fs*36	MSH p.A62_P63insAAA	LTK p.G213_A214insGGG
44	F1CDx	CTNNB1 p.D32Y	CTNNB1 p.G34R	BRCA2-STARD13 fusion
45	F1LCDx	GNAS p.R201H	CASP8 p.Q46*
46	F1LCDx	CCNE1 amp	MYC amp	AR amp	AKT2 amp	TP53 p.R110P	TP53 p.R110P	MLL2 p.R5086*	TET2 c.3409+1G>A	TP53 p.G244D	CHEK2 p.S428fs*2	AXL amp	TMPRSS-ERG fusion
47	F1CDx	SETD2 p.R136T	CIC p.P113T	TP53 p.C238G	FANCA p.A737V	IKBKE p.D296N
48	F1CDx	PTEN p.D92V	SPEN p.R715fs*2
49	F1CDx	PTEN HD
50	F1CDx	TP53 p.D49H+HD (exon2-11)	SETD2 rearrangement exon 3	ATR p.A880T	IKBKE p.R228Q
51	F1CDx	TBX3 amp	RB1 p.G435fs*20	EED p.P161S	BARD1 p.L480fs*4	BRCA2 p.N863fs*18
52	F1CDx	CDK12 p.K181fs*10
53	F1LCDx	None
54	F1CDx	TMB-high (25.34 Muts/Mbp)	MSI-High	MSH3 p.K383fs*32	PIK3CA p.V344M	ASXL1 p.646fs*12	ATR p.I774fs*5	MEN1 p.R521fs*43	SPEN p.R1542*	ARID1A p.G276fs*87	TNFAIP3 p.R183*	SPEN p.R806fs*14	MLL2 p.R5214H	PBRM1 p.N258fs*25	NF1 p.I679fs*21	MLL2 p.Q1821*
55	F1CDx	PTEN HD	TP53 HD	FANCA p.K1158fs*6	BRCA2 p.I605fs*11
56	F1CDx	WHSC1L1 amp	FGFR1 amp	ZNF703 amp
57	F1LCDx	TERT c.-124C>T
58	F1CDx	RB1 p.E554*	KDM6A p.N1158fs*20	TP53 p.F113V	PTEN HD	NF1 deletion exon 2 - intron 33
59	F1LCDx	AR p.L702H	RAC1 amp	FGF14 amp	KIT amp	PDGFRA amp	KDR amp	CARD11 amp	AR amp	AURKA amp	MYC amp	GNAS amp	TET2 p.R1465*	CREBBP c.1676+2T>G	SPEN p.I2467fs*22	ATM p.R447*	ATM p.G1868fs*40	IRS2 amp	CUL4A amp
60	F1LCDx	JAK2 amp	JAK3 amp	PDCD1LG2 amp	CCNE1 amp	CD274 amp	RB1 p.S644fs*19	PTEN HD
61	F1CDx	MDM4 amp	MYC amp	PRKCI amp	EZH2 amp	MET amp	PTCH1 p.R85fs*5	CDK12 p.R356fs*3	NOTCH2 c.2982-1G>A	PIK3C2B amp	ZNF217 amp	TERC amp	LYN amp
62	F1CDx	TP53 p.V73fs*76	CIC HD
63	F1LCDx	BRAF p.V600E	ERBB3 p.D297Y	AR p.T878A	TP53 p.R175H	APC p.S1465fs*1	SMAD4 c.250-2A>G	APC p.Q654*	GATA6 amp	FANCC deletion intron 11 - intron 13
64	F1LCDx	GNAS p.R201S	ASXL1 p.S1064fs*23	TP53 p.V274D	WT1 c.1001+1G>T
65	F1CDx	TP53 p.M246V	GRIK4-CHEK1 fusion
66	F1CDx	AR amp	CDKN1B p.K59fs*66
67	F1CDx	APC HD	ATM p.Q161fs*5
68	F1LCDx	CTNNB1 p.D32Y	AR amp	MYC amp	PTEN HD	TP53 inversion intron 1 - intron 2
69	F1CDx	RB1 HD	BRCA2 p.V1447fs*1	PTEN rearrangement intron 1
70	F1CDx	MYC amp	MUTYH p.Q253*	RAD21 amp	BRCA2 c.316+1G>T
71	F1CDx	NKX2-1 amp	FGF12 amp	SOX2 amp	BCL6 amp	MDM4 amp	TBX amp	PIK3CA amp	PRKCI amp	CDK12 p.F878fs*31	CDK12 HD	PIK3C2B amp	NFKBIA amp	MCL1 amp	NFKBIA amp	MCL1 amp
72	F1CDx	TP53 p.G245D	TP53 p.R175H
73	F1CDx	SF3B1 p.K700E	MYC amp	TBX3 amp	TNFRSF14 p.D133fs*94	NOTCH2 deletion exon 20 - intron 22
74	F1CDx	FH c.556-1G>T	BRCA2 p.E2877*
75	F1CDx	CDK12 p.R308fs*42
76	F1CDx	KDM6A p.S689fs*2	CDKN1B p.R15fs*110	KDM6A p.W632*	ARID1A p.E2200fs*31	SPOP p.F133L
77	F1CDx	CTNNB1 p.S33C	TBX amp	ERCC4 p.R490fs*13	ATM p.R248*	ATM p.M557fs*3
78	F1CDx	TP53 p.R248Q	CDH1 c.833-188_959del315	PTEN HD	PTEN-KIF11 fusion
79	F1CDx	BRCA2 HD
80	F1CDx	SF3B1 p.K700E	TP53 p.E286A	PTEN HD
81	F1CDx	MLL2 p.F1585fs*17
82	F1CDx	MSH3 p.E399*	CTNNB1 p.S37C	PIK3CA p.E453_L455del	HRAS p.Q61R	MYC amp	TP53 p.E286G
83	F1CDx	SPOP p.F125V	APC rearrangement exon 16
84	F1LCDx	TMB-High (103.68 Muts/Mbp)	MSI-High	PMS2 p.E836fs*15	MSH2 p.Q170*	SMO p.P694fs*82	GNAS p.R356H	CTNNB1 p.R582W	JAK1 p.K860fs*	AKT1 p.E17K	MYCN p.R383H	FLT3 p.A627T	ARID1A p.Q766fs*67	ATR p.L1255fs*7	SETD2 p.D2064fs*84	SPEN p.R807fs*3	RNF43 p.P154L	ARID1A p.P1576fs*27	SMAD4 p.S32fs*1	MLL2 p.P99fs*31	TP53 p.R248Q	ATR p.R177*	NF1 p.F1479fs*4	AXIN1 p.E640fs*65	QKI p.E135fs*5	DNMT3A p.C562Y	ASXL1 p.G646fs*12	CREBBP p.H2384fs*12	POLE p.R1320*	EP300 p.R86*	SPEN p.R2342*	RNF43 p.G659fs*41	PTCH1 p.S1203fs*52	ATM p.F61fs*15	ATM p.K1170fs*11
85	F1LCDx	BRAF p.G596S	MDM2 amp	AR amp	TET2 p.R814fs*10	STAG2 c.1305-2A>C	TET2 p.T495fs*9	PTEN p.G156V	TET2 p.C1193W	ATM p.R3008C	BRIP1 p.P1017fs*5
86	F1CDx	MPL amp	AR amp	MYCL1 amp	NRAS amp	CARD11 amp	ARAF amp	PTEN HD	SMAD2 HD	TMPRESS2-ERG fusion
$ In Case 11, MSI status could not be determined by F1CDx. Therefore, MSI testing was performed using the Promega panel provided by FALCO, which revealed an MSI-High result. Case 11 was considered to be both MSI-High and TMB-High. amp, amplification; F1CDx, FoundationOne® CDx cancer genome profiling; F1LCDx, FoundationOne® Liquid CDx cancer genome profiling; HD, homozygous deletion, MSI, microsat…
